# Supplementary material for: The Saharan Oscillation Index (1950–2024): Phase Structure, Regime Shifts, and Global Teleconnections
Source: Research Square preprint supplement (doi:10.21203/rs.3.rs-8832891/v1), 2026-02-23
Supplement: Supplementary file 1 [file 5e89f37923a0ac24ce76a1de.docx]

**Supplementary Material** **The Saharan Oscillation Index (1950–2024): Phase Structure, Regime Shifts, and Global Teleconnections**

*Younes TEBBAAI, Kenza KHOMSI, Mohamed KHALIS*

Supplementary table S 1 : Overview of used LSCIs

| Climate Index | Definition | Impacts on the Mediterranean Region | Key References |
| --- | --- | --- | --- |
| North Atlantic Oscillation Index (NAOI) | Large-scale atmospheric circulation pattern in the extratropical North Atlantic, characterized by a meridional oscillation of atmospheric mass between the Icelandic Low and the Azores High. | Positive phase: Leads to warm, wet weather in Northern Europe and drier, cooler conditions in the Mediterranean.  Negative phase: Results in colder, drier conditions in Northern Europe and wetter conditions in the Mediterranean. | (Hurrell, 1995; López-Moreno & Vicente-Serrano, 2008; Luppichini et al., 2024) |
| Mediterranean Oscillation Index (MOI) | Reflects atmospheric dipole oscillations between the eastern and western Mediterranean regions, measured by the geopotential height difference between Algiers and Cairo (500 hPa). | Positive Phase: Associated with dry conditions in the western Mediterranean and wetter conditions in the east.  Negative Phase: Associated with wetter conditions in the western Mediterranean and drier eastern areas. | (Bouguerra et al., 2024; Criado-Aldeanueva & Soto-Navarro, 2020; Palutikof, 2003) |
| Arctic Oscillation Index (AOI) | Quantifies changes in atmospheric pressure patterns between the polar and mid-latitude regions of the Northern Hemisphere, reflecting the intensity of the polar vortex. | Positive phase: Leads to dry and clear weather conditions in the Mediterranean due to high-pressure displacement.  Negative phase: Increased cloudiness and precipitation in the Western Mediterranean. | (Creilson et al., 2005; Fang et al., 2024; Ninglian et al., 2003; Zhang et al., 2021) |
| Northern Oscillation Index (NOI) | Quantifies the Northern Oscillation, influenced by SLP differences between the North Pacific High and Darwin, Australia. | Impacts are less direct but linked to broader atmospheric dynamics, including interactions with ENSO and AO. | (Schwing et al., 2002) |
| Southern Oscillation Index (SOI) | Measures pressure fluctuations between the eastern and western tropical Pacific; the atmospheric component of ENSO. | Negative SOI (El Niño): Associated with warmer ocean waters and increased rainfall in the western Mediterranean.  Positive SOI (La Niña): Associated with cooler ocean waters and decreased rainfall. | (Clement et al., 2011; Kawamura et al., 1998; Peng et al., 2011; Power & Kociuba, 2011; Ropelewski & Halpert, 1989) |
| Oceanic Niño Index (ONI) | Monitors El Niño-Southern Oscillation (ENSO) events based on 3-month rolling average SST anomalies in the Niño 3.4 region. | El Niño (Positive ONI): Associated with increased autumn rainfall (~10%) in the western Mediterranean and an earlier rainy season.  La Niña (Negative ONI): Associated with decreased spring rainfall, leading to an early retreat of the rainy season. | (Di Leo et al., 2024; Fan et al., 2023; Glantz & Ramirez, 2020; Tedeschi et al., 2013; Vimont et al., 2022) |
| Pacific North American Index (PNAI) | Measures atmospheric teleconnection patterns affecting North Pacific and North American weather, particularly in winter. | Alters jet stream patterns, which may influence Mediterranean weather through downstream changes in North Atlantic circulation. | (Hu et al., 2023; Rodionov & Assel, 2001; Wallace & Gutzler, 1981) |
| Pacific Decadal Oscillation Index (PDOI) | Reflects long-term fluctuations in North Pacific sea surface temperatures, with phases lasting 20–30 years. | Modulates global climate patterns, potentially affecting Mediterranean precipitation and temperature regimes over decadal timescales. | (Boer & Sospedra-Alfonso, 2019; Deser et al., 2016; Li et al., 2015) |
| Tropical Atlantic Dipole Index (TNAI/TSAI) | Measures SST anomalies in the tropical Atlantic, forming a dipole structure between the Tropical North Atlantic (TNA) and Tropical South Atlantic (TSA). | Influences regional climate variability, affecting Mediterranean weather through Atlantic-Mediterranean teleconnections and the West African Monsoon. | (Chen & Wu, 2017; Gbangou et al., 2020; Hounsou-Gbo et al., 2019; Sheng et al., 2023; Yang & Fan, 2023) |
| Western Pacific Index (WPI) | Measures air pressure fluctuations over the western Pacific, influencing East Asian and western Pacific weather systems. | Indirect impacts through global atmospheric circulation changes (planetary wave propagation). | (Aru et al., 2021; Dai & Tan, 2019.; Zhuge & Tan, 2018) |
| North Pacific Index (NPI) | Measures interannual to interdecadal changes in atmospheric circulation over the North Pacific. | Influences Mediterranean weather through atmospheric-ocean interactions and modulation of the westerly flow. | (Lapointe et al., 2017; Minobe & Mantua, 1999; Xiao & Ren, 2023) |
| Western Hemisphere Warm Pool Index (WHWPI) | Tracks the area of the ocean surface warmer than 28.5°C in the tropical Atlantic and eastern North Pacific. | Contributes to changes in atmospheric circulation (Hadley/Walker cells) that affect Mediterranean weather during warm pool expansion/contraction. | (Enfield et al., 2006; López-Magaña et al., 2022; Park et al., 2018; Wang & Enfield, 2001) |
